# Supplementary material for: Hand pressures during arboreal locomotion in captive bonobos (Pan paniscus)
Source: Oxford University Press journal article supplement (doi:10.1242/jeb.170910), 2018-01-01
Supplement: jeb170910supp.pdf [file jeb170910supp.pdf]

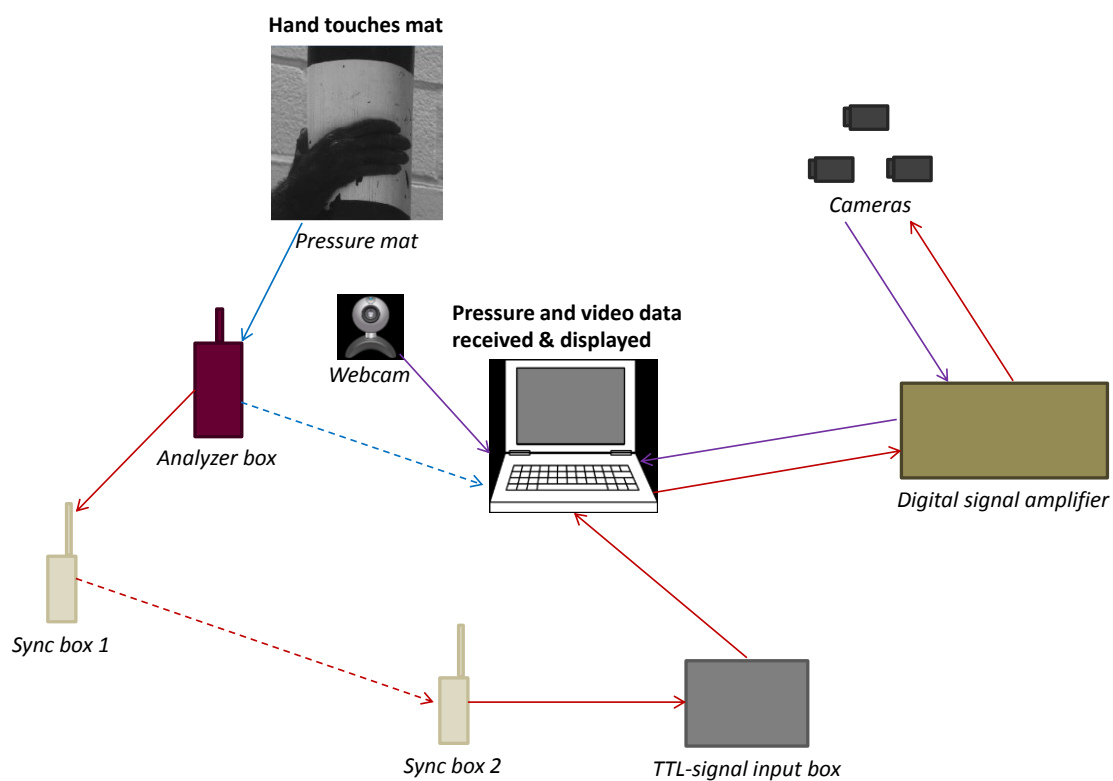

**Fig. S1:** Illustration of the technical set-up. Grasping of the pressure mat results in both the generation of pressure data and the initiation of the synchronisation signal which triggers the high-speed cameras to record. Blue arrows – route for pressure data transfer. Maroon arrows – route for synchronisation signal transfer. Purple arrows – route for visual data transfer. Solid arrows reflect a direct, wired connection whilst dotted arrows are for Bluetooth connections.
